# Supplementary material for: Interleukin-27 Regulates the Function of the Gastrointestinal Epithelial Barrier in a Human Tissue-Derived Organoid Model
Source: MDPI journal article supplement (doi:10.3390/biology11030427), 2022-03-11
Supplement: s1 [file s1]

Supplementary FigureS1 – Expression of IL-27R $\alpha$  and TLR4 in human colonic organoid in a model of IBD

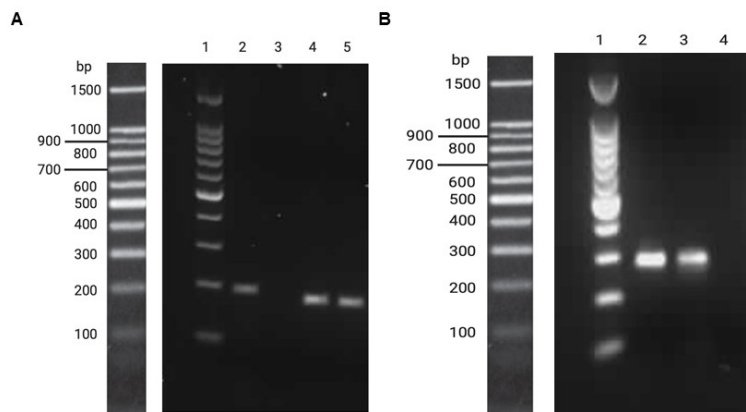

(A) Expression of IL-27R $\alpha$  confirmed by PCR amplification of RNA isolated from human patient derived organoids. DNA size ladder (lane 1), positive control (Caco-2 cDNA) (lane 2), negative control (lane 3), human intestinal epithelial organoids (lanes 4-5). (B) Expression of TLR4, DNA size ladder (lane 1), positive control (Caco-2 cDNA) (lane 2), human intestinal epithelial organoids (lanes 3), negative control (lane 4).
